# Supplementary material for: Axial oxygen-bridged FeN4O/NC produced by ultrafast Joule heating for efficient oxygen reduction reaction
Source: Royal Society of Chemistry journal article supplement (doi:10.1039/d4cc05604c), 2024-01-01
Supplement: d4cc05604c1.pdf [file d4cc05604c1.pdf]

## Supplementary Information

### **Axial oxygen-bridged FeN<sub>4</sub>O/NC produced by ultrafast joule heating for efficient oxygen reduction reaction**

Feng Liu,<sup>a,1</sup> Xinyu Guo,<sup>a,1</sup> Yan Zhong,<sup>a</sup> Shaqi Fu,<sup>a</sup> Jingsha Li,<sup>a</sup> Chunmei Zhang,<sup>a</sup> Heng Zhang,<sup>a</sup> Fenghui Ye,<sup>b</sup> Shuai Yuan,<sup>c</sup> Chuangang Hu<sup>\*b</sup> and Chunxian Guo<sup>\*a</sup>

<sup>a</sup> Institute of Materials Science and Devices, School of Materials Science and Engineering, Suzhou University of Science and Technology, Suzhou 215009, China.

<sup>b</sup> State Key Laboratory of Organic-Inorganic Composites, College of Chemical Engineering, Beijing University of Chemical Technology, Beijing 100029, China.

<sup>c</sup> School of Software and Microelectronics, Peking University, Beijing 102600, China.

<sup>1</sup> These authors contributed equally.

\*Corresponding authors

E-mail: [cxguo@usts.edu.cn](mailto:cxguo@usts.edu.cn) (C. Guo)

[chuangang.hu@mail.buct.edu.cn](mailto:chuangang.hu@mail.buct.edu.cn) (C. Hu)

## Experimental Section

**Preparation of NC.** 2.23 g zinc nitrate was dissolved in 50 mL methanol as solution A; 2.44 g 2-methimidazole were dissolved in 50 mL methanol, named solution B, solution A was poured into solution B, adjusting the reaction speed to 800 rpm for 24 h. The resulting solution was centrifuged at 12,000 rpm for 2 min, washed twice with methanol, and finally dried in vacuum at 60 °C. The obtained product was denoted as ZIF-8. The precursor ZIF-8 was heat-treated at 950 °C in Ar atmosphere for 2 hours with a heating rate of 5 °C min<sup>-1</sup> and then naturally cooled to room temperature, respectively. The resulted product were denoted as NC.

**Preparation of FeN<sub>4</sub>O/NC and FeN<sub>4</sub>/NC.** 50 mg of NC was dispersed in 100 mL of *N,N*-Dimethylformamide (DMF) by ultrasound for 2 h. Thereafter 0.3 mL of [Fe(Phen)<sub>3</sub>]<sup>2+</sup> ethanol solution (50 mg mL<sup>-1</sup>, prepared by dissolving ferrous acetate (Fe(Ac)<sub>2</sub>) and 1,10 phenanthroline (phen) with molar ratio of 1:3 in ethanol) were added drop-wise into the above dispersion with vigorous stirring. The resulting mixture was stirred and allowed to adsorb at room temperature for 12 h. The adsorbed mixture was washed three times with acetone in a centrifuge at 12,000 rpm for 2 min, with the resulting [Fe(Phen)<sub>3</sub>]<sup>2+</sup>/NC oven-dried at 60 °C to obtain the desired precursor. The precursor [Fe(Phen)<sub>3</sub>]<sup>2+</sup>/NC was placed into the graphite tubes and subjected to the periodic carbothermal shock treatment (Input current: 100 A; 3 s-heating and 6 s-cooling is one cycle, total 14 cycles) using the Joule heating equipment (Hefei In-situ Technology Co., Ltd. Anhui, China) in an argon atmosphere. The resulted product were denoted as FeN<sub>4</sub>O/NC (i.e. FeN<sub>4</sub>O/NC-0.3). Similarly, when 0.1 and 0.5 mL of [Fe(Phen)<sub>3</sub>]<sup>2+</sup> ethanol solution were introduced, FeN<sub>4</sub>O/NC-0.1 and FeN<sub>4</sub>O/NC-0.5 were prepared. The synthesis of FeN<sub>4</sub>/NC involved the introduction of 100 mL of ethanol in place of 100 mL of DMF, the following procedures were identical to the preparation of FeN<sub>4</sub>O/NC.

**Materials Characterization.** Scanning electron microscopy (SEM) images were obtained from Zeiss Gemini 300 scanning electron microscope. Transmission electron microscopy (TEM), high resolution transmission electron microscopy (HRTEM),

high-annular dark-field scanning TEM (HAADF-STEM), and EDS were conducted on a JEOL JEM-2200FS transmission electron microscope. Aberration-corrected High-angle annular dark-field scanning transmission electron microscopy (HAADF-STEM) images were performed with a JEOL JEM-ARM 200F transmission electron microscope with a probe corrector operated at 200 kV. The X-ray absorption fine structure spectra (XAFS) spectra at the Fe K-edge were measured at 1W1B station in Beijing Synchrotron Radiation Facility (BSRF, operated at 2.5 GeV with a maximum current of 250 mA). The spectra of samples were recorded in fluorescence excitation mode using a Lytle detector. The spectra of Fe foil and Fe<sub>2</sub>O<sub>3</sub> were used as references, and recorded in a transmission mode using ionization chamber. The crystal phases of the samples were characterized by a Bruker D2 Phaser X-ray diffractometer with a Cu K $\alpha$  radiation source (30 kV, 10 mA). Raman spectra were recorded using a Horiba LabRAM HR Evolution Raman spectrometer operating with a laser wavelength of 532 nm. The nitrogen adsorption and desorption isotherms were studied by using a Micrometrics ASAP 2460 Specific surface and porosity analyzer. The specific surface area and pore size distribution were calculated from the nitrogen adsorption-desorption isotherms. X-ray photoelectron spectroscopy (XPS) measurements were carried out on a Kratos AXIS SUPRA X-ray photoelectron spectrometer with an Al K $\alpha$  radiation (15 kV, 10 mA).

**Electrochemical Measurements.** The oxygen reduction reaction (ORR) activities of catalysts were measured by a CHI Electrochemical workstation (model 760c) with a standard three-electrode system at room temperature. The catalyst-coated glassy carbon rotating disk electrode (RDE, 5 mm in diameter) or rotating ring-disk electrode (RRDE, disk outer diameter, ring inner diameter and ring outer diameter are 5.61 mm, 6.25 mm, and 7.92 mm, respectively) was used as the working electrode, an Ag/AgCl electrode in saturated KCl solution was used as the reference electrode, and graphite rod was used as counter electrode. All of the potentials reported in this paper were calibrated to the reversible hydrogen electrode. To prepare a homogeneous catalyst ink, 3 mg of catalyst was dispersed in a solution of 147  $\mu$ L of deionized water,

147  $\mu\text{L}$  of isopropanol and 6  $\mu\text{L}$  of a Nafion solution (5 wt%, Alfa Aesar D521) under sonication for 2 h. Then 7.5  $\mu\text{L}$  of catalyst ink were loaded onto the glassy carbon and dried in air. A Pt/C (20 wt% of Pt, Johnson Mattery HiSPEC) catalyst with a loading of 40  $\mu\text{g Pt cm}^{-2}$  was used as a reference. Linear scan voltammetry (LSV) tests were carried out in  $\text{O}_2$ -saturated 0.1 M KOH solution with a scan rate of 5  $\text{mV s}^{-1}$ . Four-electron selectivity during the ORR was determined by measuring LSV curves on RDE at various rotating speeds (625, 900, 1225, 1600, and 2025 rpm). The corresponding electron transfer number was determined from the slope of the linear line according to the following Koutechy-Levich (K-L) equation:

$$\frac{1}{J} = \frac{1}{J_L} + \frac{1}{J_K} = \frac{1}{B\omega^{1/2}} + \frac{1}{J_K}$$

$$B = 0.62nF(D_0)^{2/3}(\nu)^{-1/6}C_0 \quad (1)$$

where  $J$ ,  $J_L$ ,  $J_K$  are the measured current density, diffusion-limiting current density, and kinetic current density, respectively.  $\omega$  is the angular velocity of the disk ( $\omega = 2\pi N$ ,  $N$  is the rotation speed),  $n$  is the electron transfer number,  $F$  is the Faraday constant ( $F = 96,485 \text{ C mol}^{-1}$ ),  $D_0$  is the diffusion coefficient of oxygen ( $D_0 = 1.9 \times 10^{-5} \text{ cm}^2 \text{ s}^{-1}$ , 0.1 M KOH),  $C_0$  is the bulk concentration of oxygen ( $C_0 = 1.2 \times 10^{-6} \text{ mol cm}^{-3}$ , 0.1 M KOH),  $\nu$  is the kinetic viscosity of the electrolyte ( $\nu = 0.01 \text{ cm}^2 \text{ s}^{-1}$ ). The electron transfer number ( $n$ ) and the yield of  $\text{H}_2\text{O}_2$  were calculated from the RRDE measurement based on the disk current ( $I_d$ ) and ring current ( $I_r$ ) via the following equations:

$$n = 4 \times \frac{I_d}{I_d + I_r / N} \quad (2)$$

$$\text{H}_2\text{O}_2 \% = 200 \times \frac{I_r}{(I_r + NI_d)} \quad (3)$$

Where  $N = 0.37$  is the current collection efficiency of Pt ring.

**Zn-air battery test.** The home-made zinc-air battery device has been employed for the battery performance measurements. The electrolyte used for the electrochemical liquid zinc-air battery was 6 M KOH and 0.2 M  $\text{Zn}(\text{Ac})_2$  aqueous solution. Typically,

5 mg catalysts mixed with 20  $\mu$  L Nafion solution (5 wt%, Alfa Aesar D521) were dispersed in 490  $\mu$  L of deionized water and 490  $\mu$  L of isopropanol solution by sonicating for 2 h to form a homogeneous ink. The obtained catalyst ink was then brushed onto a piece of carbon paper with an effective area of 1 cm<sup>2</sup> until the loading amount reaching 1 mg cm<sup>-2</sup>, which was serving as the cathode for Zn-air battery. A polished zinc plate (0.1 mm thickness) was used as the anode. As a reference material, 20 wt% Pt/C catalysts were prepared as the same procedure and the Pt/C loading on the carbon was 1.0 mg cm<sup>-2</sup>. All the Zn-air batteries were tested under ambient atmosphere. Discharge polarization and power density curves were measured on CHI 760E electrochemical workstation (CHI Instruments, Inc., Shanghai). The galvanostatic discharge test were performed on a LAND CT2001A testing system.

**Computational details.** The density functional theory (DFT) calculations were carried out using the DMol3<sup>[1]</sup> module implemented in Material Studio. The GGA method as implemented with Perdew, Burke, and Ernzerhof (PBE-GGA)<sup>[2, 3]</sup> was used to describe the exchange-correlation functional component of the Hamiltonian. The k point grids were set as 2  $\times$  2  $\times$  1 for the Brillouin zone and a large vacuum slab of 15 Å is inserted in z direction for surface isolation to prevent interaction between two neighboring surfaces. The convergence threshold for the iteration in self-consistent-field (SCF) is set to be 10<sup>-5</sup> eV. A smearing of 0.005 Ha (1 Ha = 27.21 eV) to the orbital occupation was applied. The geometry convergence tolerance for energy change, max force and max displacement were 1  $\times$  10<sup>-5</sup> Ha, 0.002 Ha/Å, 0.005 Å, respectively.

The ORR proceeds for four-electron pathway in alkaline electrolyte are shown as follows:<sup>[4]</sup>

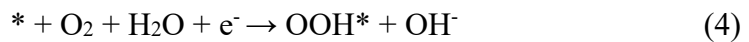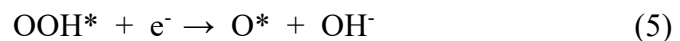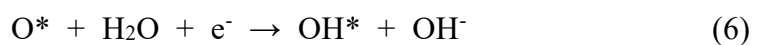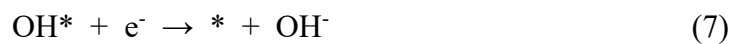

Where \* refers to an active site on the catalysts surface.

The reaction Gibbs free energy changes ( $\Delta G$ ) were calculated by the following equation:

$$\Delta G = \Delta E + \Delta ZPE - T\Delta S + \Delta G_{\text{pH}} + \Delta G_U \quad (8)$$

Where  $\Delta E$  is obtained directly from DFT calculation results,  $\Delta ZPE$  is the correction of zero point vibration energy (ZPE),  $T$  is the room temperature of 298.15K, and  $\Delta S$  is the correction for entropy.  $\Delta G_{\text{pH}} = -k_B T \ln[H^+] = pH \times k_B T \ln 10$ ,<sup>[5]</sup> is the change of free energy owing to the effect of pH value of the electrolyte.  $\Delta G_U = -neU$ , is the effect of the electrons transfer in the electrode and the electrode potential contribution to  $\Delta G$ .

## Supplementary Figures

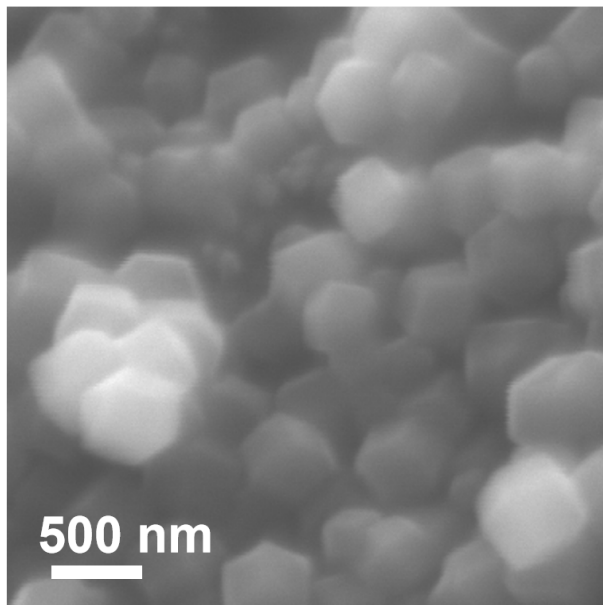

**Fig. S1.** SEM image of NC.

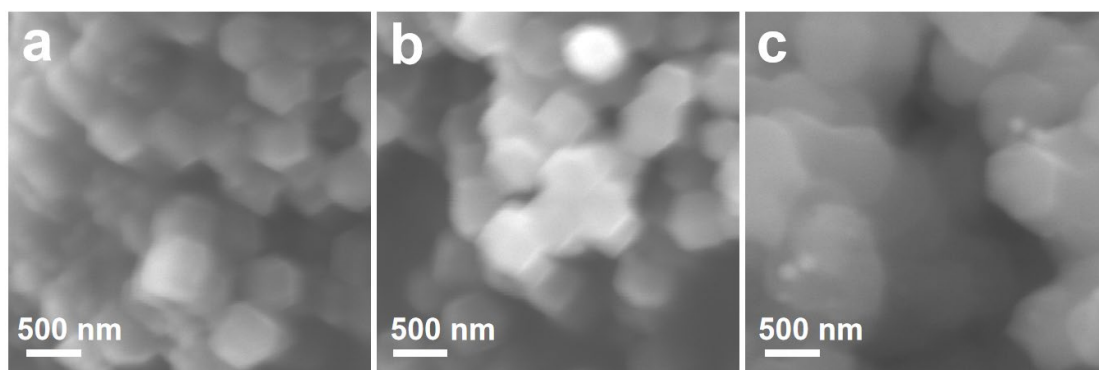

**Fig. S2.** SEM images of of FeN<sub>4</sub>O/NC-0.1, FeN<sub>4</sub>O/NC-0.3, and FeN<sub>4</sub>O/NC-0.5 prepared with different [Fe(Phen)<sub>3</sub>]<sup>2+</sup> ethanol solution addition.



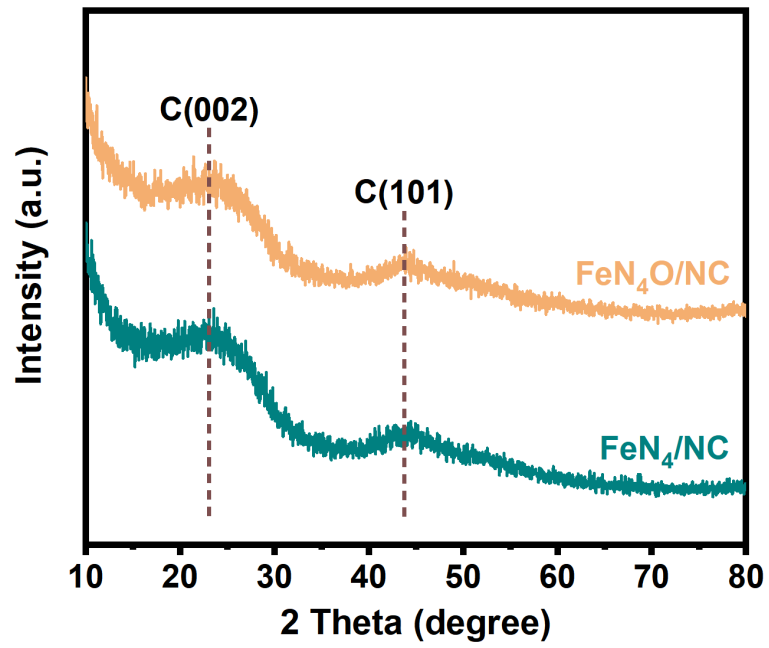

Fig. S3. XRD patterns of FeN<sub>4</sub>O/NC and FeN<sub>4</sub>/NC.

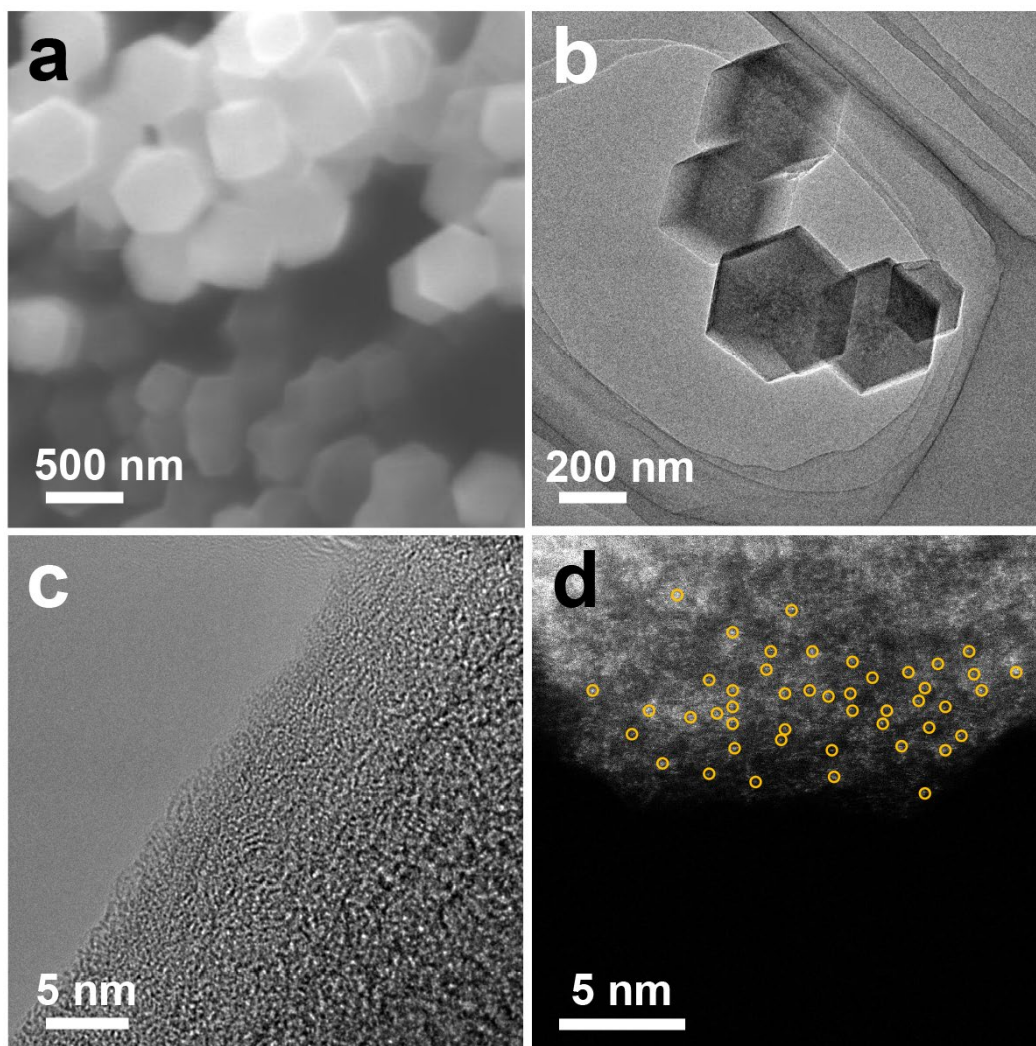

**Fig. S4** (a) SEM and (b) TEM images of FeN<sub>4</sub>/NC. (c) HRTEM and (d) AC HAADF-STEM images of FeN<sub>4</sub>/NC.

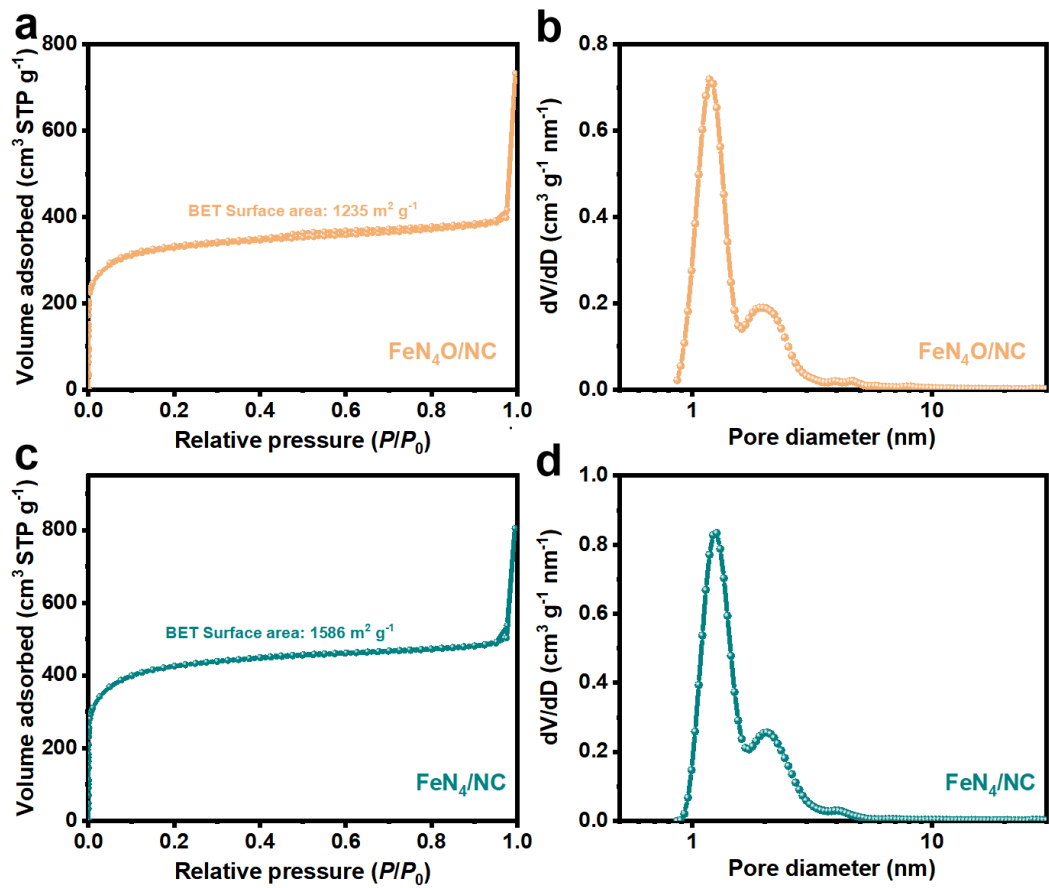

**Fig. S5.** N<sub>2</sub> adsorption-desorption isotherms of (a) FeN<sub>4</sub>O/NC and (c) FeN<sub>4</sub>/NC. Corresponding pore size distribution curves of (b) FeN<sub>4</sub>O/NC and (d) FeN<sub>4</sub>/NC.

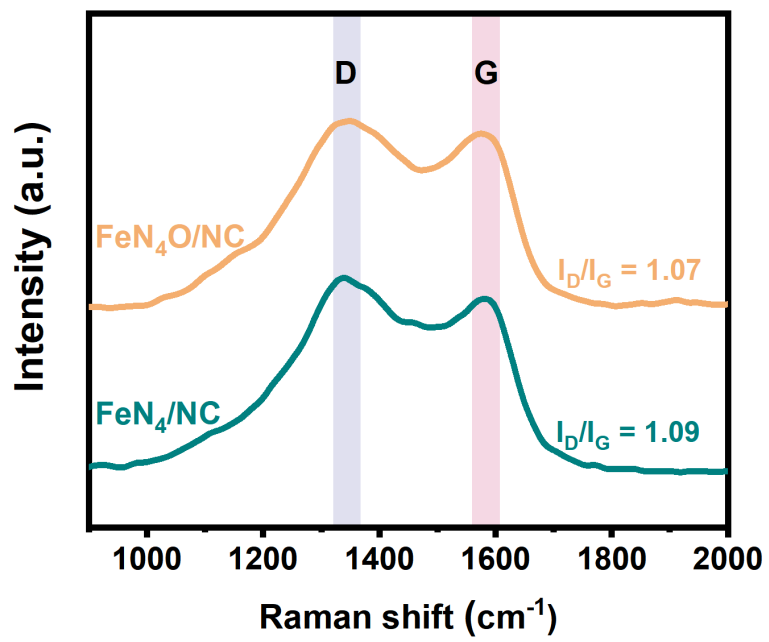

Fig. S6. Raman spectra of FeN<sub>4</sub>O/NC and FeN<sub>4</sub>/NC.

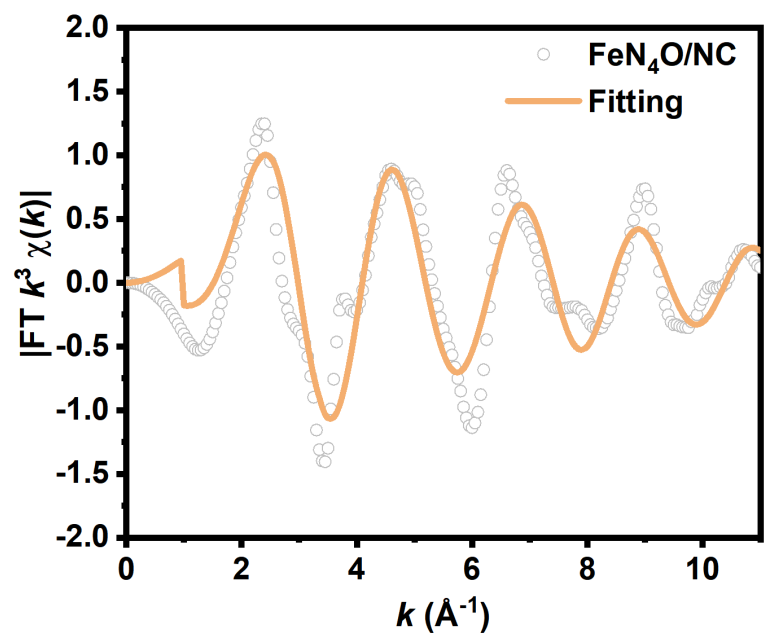

**Fig. S7.** The corresponding FT-EXAFS k-space fitting curve of FeN<sub>4</sub>O/NC.

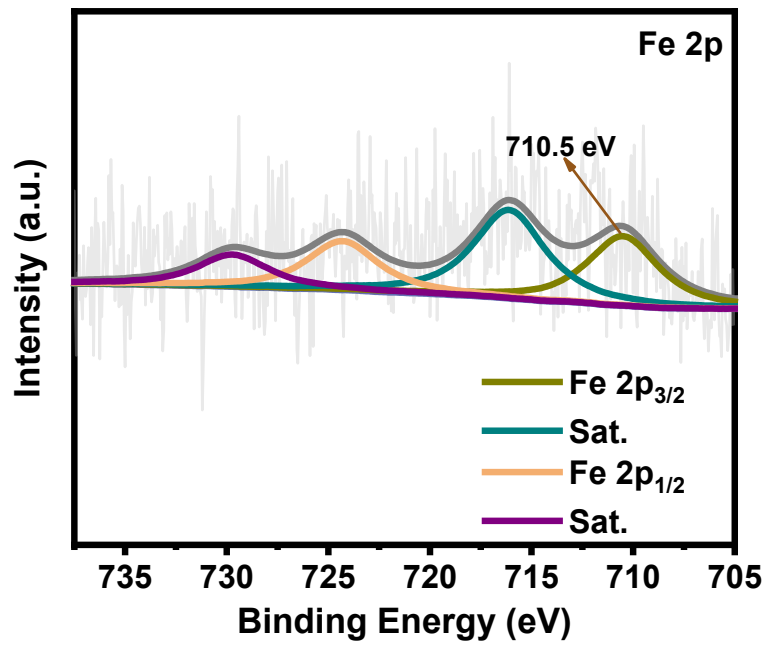

Fig. S8. High-resolution Fe 2p XPS spectrum of FeN<sub>4</sub>/NC.

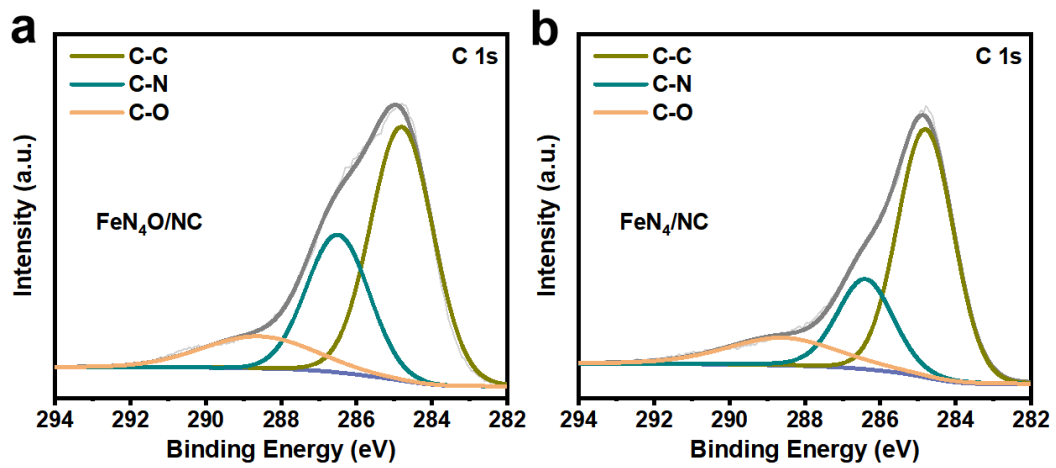

**Fig. S9.** High-resolution C 1s XPS spectra of (a) FeN<sub>4</sub>O/NC and (b) FeN<sub>4</sub>/NC.

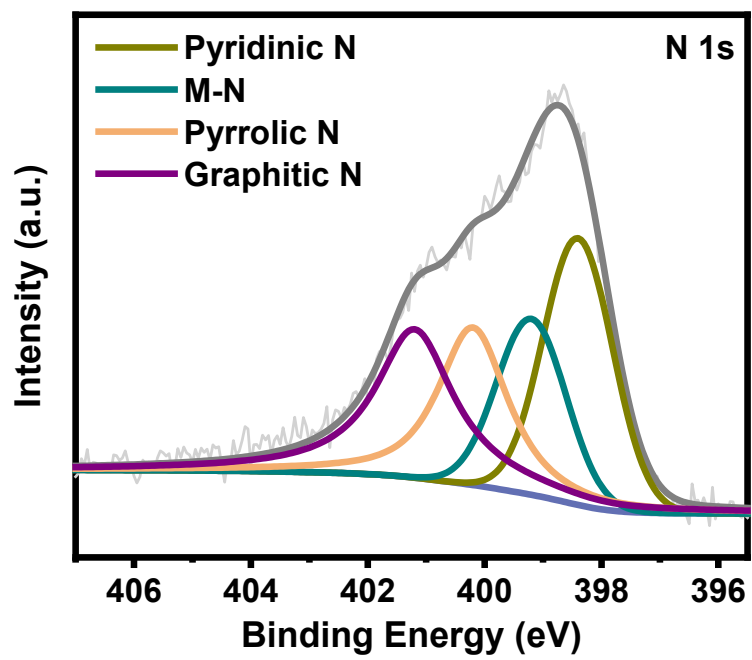

Fig. S10. High-resolution N 1s XPS spectrum of FeN<sub>4</sub>/NC.



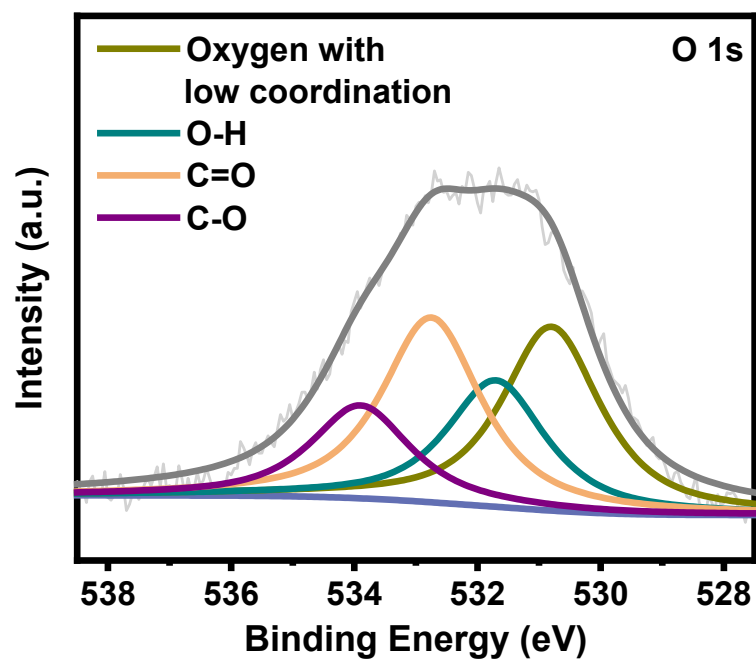

Fig. S11. High-resolution O 1s XPS spectrum of FeN<sub>4</sub>/NC.

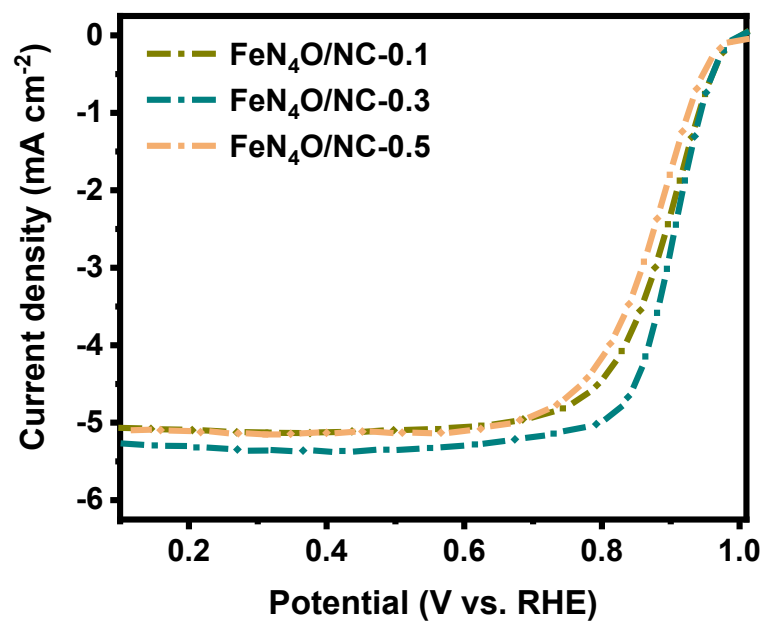

**Fig. S12.** ORR polarization curves of FeN<sub>4</sub>O/NC-0.1, FeN<sub>4</sub>O/NC-0.3, and FeN<sub>4</sub>O/NC-0.5 in O<sub>2</sub>-saturated 0.1 M KOH solution with a scan rate of 5 mV S<sup>-1</sup> and a rotation rate of 1600 rpm.

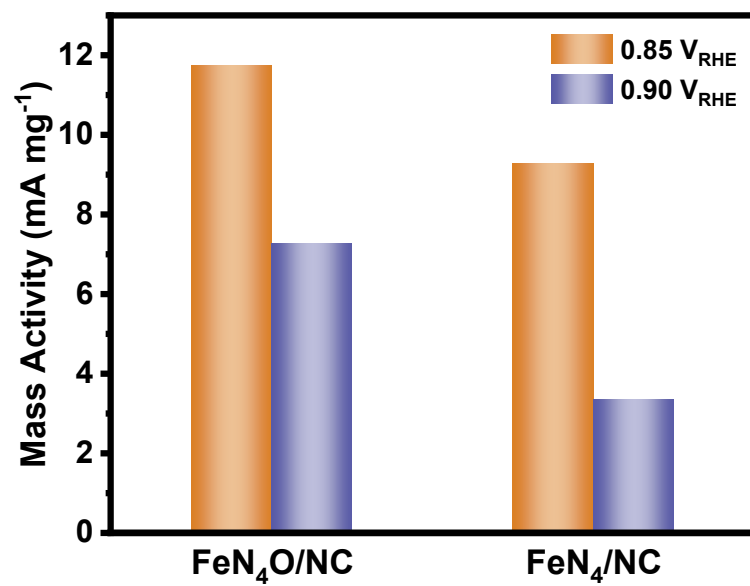

**Fig. S13.** A comparison of the mass activities of FeN<sub>4</sub>O/NC and FeN<sub>4</sub>/NC catalysts at 0.85 V and 0.90 V versus RHE.

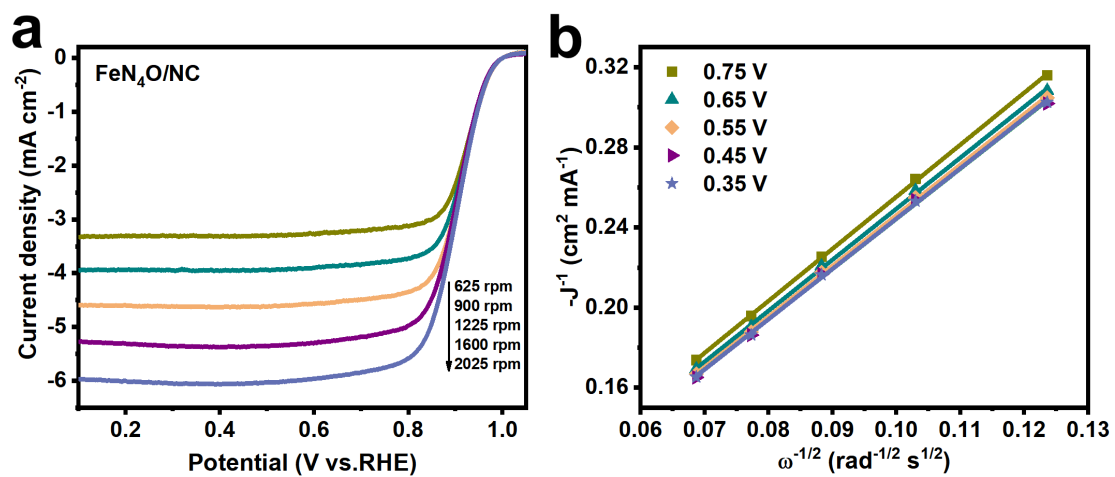

Fig. S14. (a) ORR polarization curves of FeN<sub>4</sub>O/NC at various rotation rates. (b) Corresponding K-L plots.

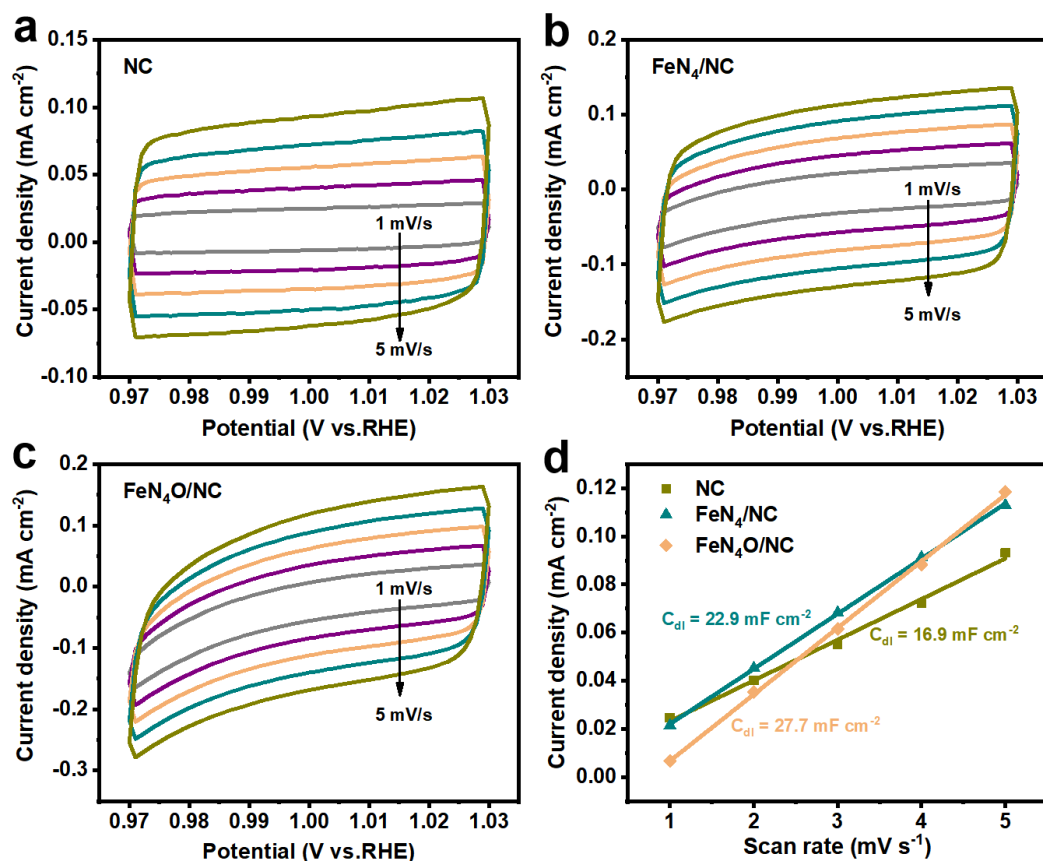

**Fig. S15.** Cyclic voltammograms curves of (a) NC, (b)  $\text{FeN}_4/\text{NC}$  and (c)  $\text{FeN}_4\text{O}/\text{NC}$  at different scan rates (1, 2, 3, 4 and 5  $\text{mV/s}$ ) in the region of 0.97-1.03 V vs. RHE for ORR. (d) Electrochemical double-layer capacitance ( $C_{dl}$ ) of NC,  $\text{FeN}_4/\text{NC}$  and  $\text{FeN}_4\text{O}/\text{NC}$ .

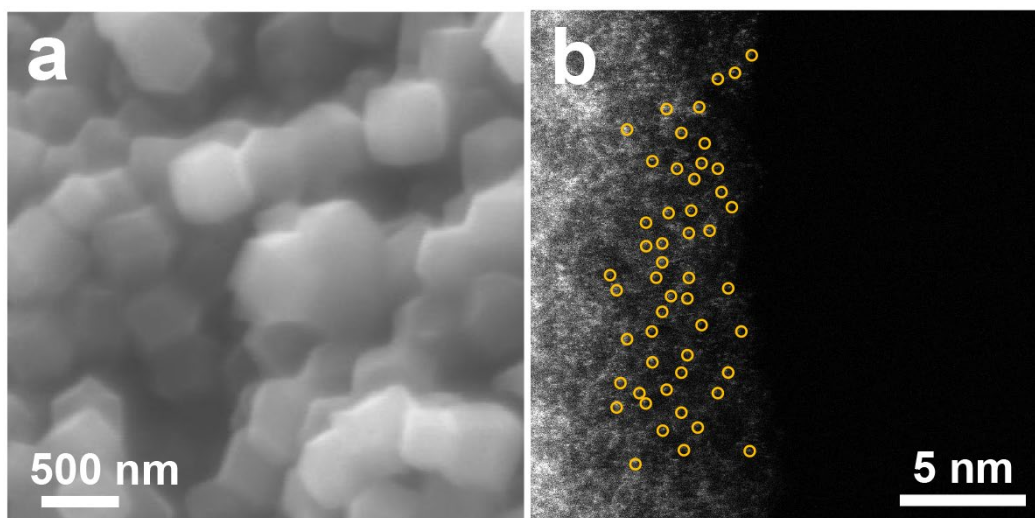

**Fig. S16.** (a) SEM and (b) AC HAADF-STEM images of the used FeN<sub>4</sub>O/NC after durability test.

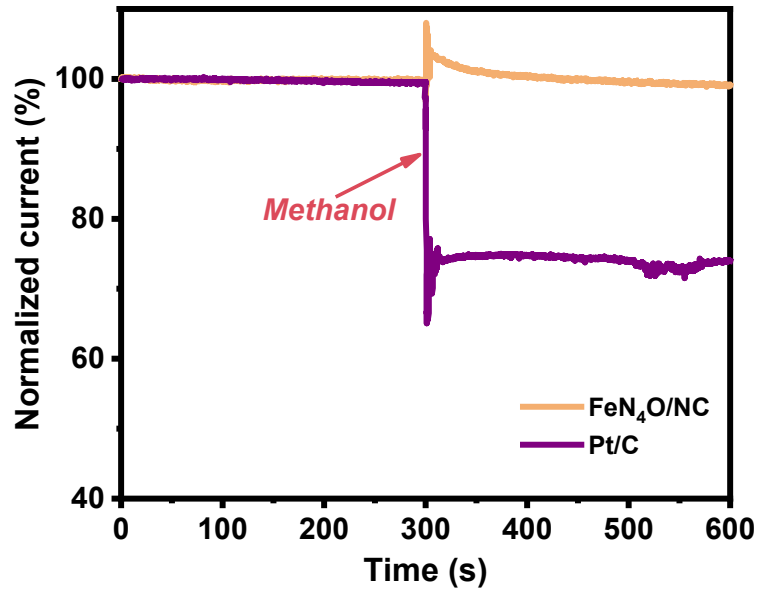

Fig. S17. Methanol resistance test of FeN<sub>4</sub>O/NC and Pt/C.

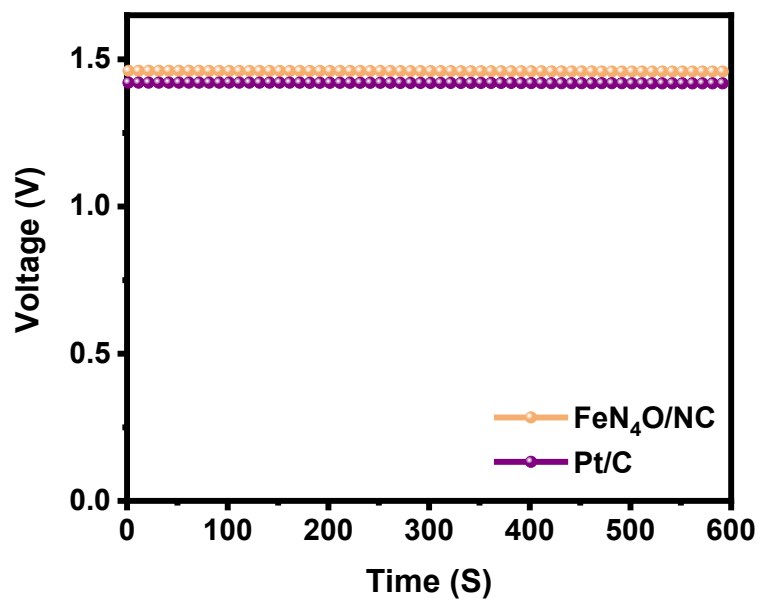

**Fig. S18.** Open-circuit potentials (OCV) of Zn-air batteries with FeN<sub>4</sub>O/NC and Pt/C as the air cathode catalysts, respectively.



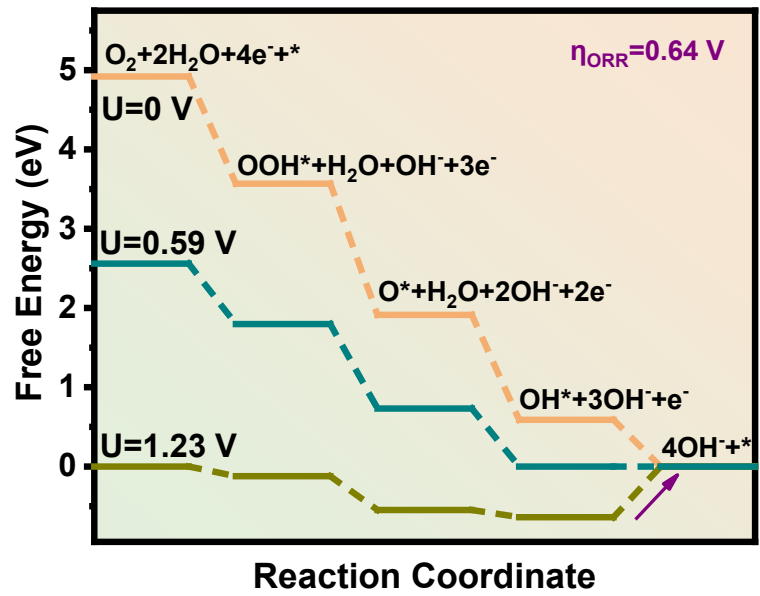

Fig. S19. ORR free-energy diagrams of FeN<sub>4</sub>/NC model.

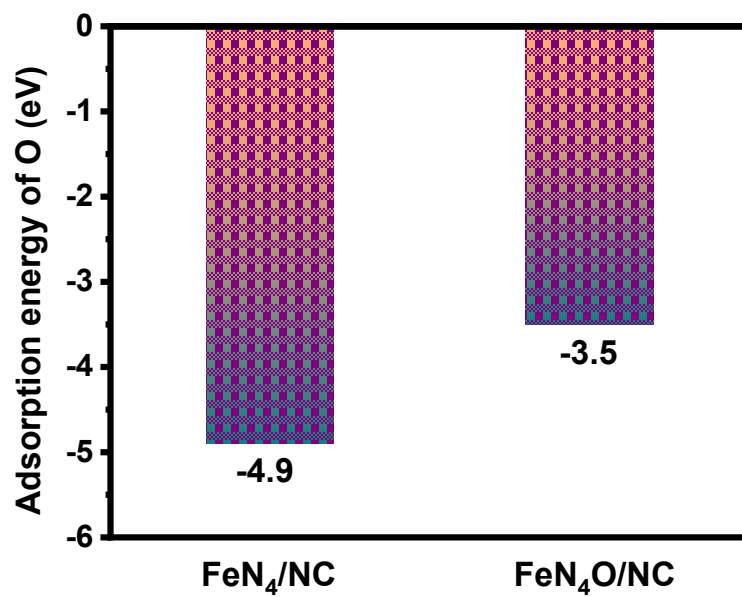

**Fig. S20.** Adsorption energy of O on the central Fe atom in FeN<sub>4</sub>/NC and FeN<sub>4</sub>O/NC sites.

## Supplementary Tables

**Table S1.** The values of specific surface area, total pore volume and micropore volume of FeN<sub>4</sub>O/NC and FeN<sub>4</sub>/NC catalysts.

| Sample                | S <sub>BET</sub> (m <sup>2</sup> g <sup>-1</sup> ) | Total pore volume (cm <sup>3</sup> g <sup>-1</sup> ) | Micropore volume (cm <sup>3</sup> g <sup>-1</sup> ) |
|-----------------------|----------------------------------------------------|------------------------------------------------------|-----------------------------------------------------|
| FeN <sub>4</sub> O/NC | 1235                                               | 0.56                                                 | 0.34                                                |
| FeN <sub>4</sub> /NC  | 1586                                               | 0.53                                                 | 0.38                                                |

**Table S2.** XPS elemental quantification of FeN<sub>4</sub>O/NC and FeN<sub>4</sub>/NC catalysts.

| Sample                | C (at%) | N (at%) | O (at%) | Fe (at%) |
|-----------------------|---------|---------|---------|----------|
| FeN <sub>4</sub> O/NC | 82.32   | 7.91    | 9.15    | 0.62     |
| FeN <sub>4</sub> /NC  | 83.51   | 7.57    | 8.24    | 0.68     |

**Table S3.** The iron contents of FeN<sub>4</sub>O/NC-0.1, FeN<sub>4</sub>O/NC-0.3, and FeN<sub>4</sub>O/NC-0.5 prepared with different [Fe(Phen)<sub>3</sub>]<sup>2+</sup> ethanol solution addition determined by ICP-OES.

| Sample                    | Fe (weight percentage, %) |
|---------------------------|---------------------------|
| FeN <sub>4</sub> O/NC-0.1 | 0.52                      |
| FeN <sub>4</sub> O/NC-0.3 | 0.71                      |
| FeN <sub>4</sub> O/NC-0.5 | 0.82                      |

**Table S4.** ORR activity comparison of FeN<sub>4</sub>O/NC with previously reported highly active non-precious metal catalysts.

| Catalyst                              | Loading (mg cm <sup>-2</sup> ) | Electrolyte      | $E_{1/2}$ (V vs. RHE) | Reference                                                  |
|---------------------------------------|--------------------------------|------------------|-----------------------|------------------------------------------------------------|
| <b>FeN<sub>4</sub>O/NC</b>            | <b>0.38</b>                    | <b>0.1 M KOH</b> | <b>0.903</b>          | <b>This work</b>                                           |
| HCNT@Co-NC                            | 0.4                            | 0.1 M KOH        | 0.85                  | <i>Chem. Commun.</i> <b>2024</b> , 60, 1476-1479.          |
| Fe <sub>2</sub> /NC                   | 0.51                           | 0.1 M KOH        | 0.90                  | <i>Angew. Chem. Int. Ed.</i> <b>2024</b> , e202413179.     |
| Fe <sub>2</sub> -pPc                  | 0.255                          | 0.1 M KOH        | 0.92                  | <i>J. Am. Chem. Soc.</i> <b>2024</b> , 146, 24842-24854.   |
| FeCo/DA@NC                            | 0.306                          | 0.1 M KOH        | 0.84                  | <i>Small</i> <b>2024</b> , 20, 2305390.                    |
| CoCOP-COOH@KB                         | 0.25                           | 0.1 M KOH        | 0.86                  | <i>Nat. Commun.</i> <b>2024</b> , 15, 6077.                |
| Fe-Co-NC                              | 0.408                          | 0.1 M KOH        | 0.88                  | <i>Adv. Funct. Mater.</i> <b>2024</b> , 2408257.           |
| FeSn-C <sub>2</sub> N                 | 0.4                            | 0.1 M KOH        | 0.914                 | <i>J. Am. Chem. Soc.</i> <b>2024</b> , 146, 21357-21366.   |
| Cl-FeN <sub>4</sub>                   | 0.5                            | 0.1 M KOH        | 0.92                  | <i>Adv. Funct. Mater.</i> <b>2024</b> , 2409794.           |
| FeN <sub>4</sub> Cl-SAzyme            | -                              | 0.1 M KOH        | 0.885                 | <i>Chem. Commun.</i> <b>2023</b> , 59, 3550-3553.          |
| Zn-N <sub>4</sub> -O                  | 0.4                            | 0.1 M KOH        | 0.884                 | <i>Adv. Sci.</i> <b>2023</b> , 10, 2302152.                |
| Mn SAs/Fe <sub>3</sub> C NPs@NPC      | 0.5                            | 0.1 M KOH        | 0.88                  | <i>Nano Res.</i> <b>2022</b> , 15, 7976-7985.              |
| Ru-SAS/SNC                            | 0.4                            | 0.1 M KOH        | 0.861                 | <i>J. Am. Chem. Soc.</i> <b>2022</b> , 144, 2197-2207.     |
| V-N-C SAC                             | 0.4                            | 0.1 M KOH        | 0.858                 | <i>Chem. Eng. J.</i> <b>2022</b> , 444, 136363.            |
| r-Fe-NC                               | 0.6                            | 0.1 M KOH        | 0.90                  | <i>Sci. Bull.</i> <b>2022</b> , 67, 1264-1273.             |
| d-SA-FeNC                             | -                              | 0.1 M KOH        | 0.90                  | <i>ACS Catal.</i> <b>2022</b> , 12, 5397-5406              |
| Fe SA-NSC-900                         | 0.1                            | 0.1 M KOH        | 0.86                  | <i>ACS Energy Lett.</i> <b>2021</b> , 6, 379-386.          |
| Co <sub>1</sub> -N <sub>3</sub> PS/HC | 0.51                           | 0.1 M KOH        | 0.92                  | <i>Angew. Chem. Int. Ed.</i> <b>2021</b> , 60, 3212-3221.  |
| Fe/OES                                | 0.4                            | 0.1 M KOH        | 0.85                  | <i>Angew. Chem. Int. Ed.</i> <b>2020</b> , 132, 7454-7459. |
| E-FeNC                                | 0.5                            | 0.1 M KOH        | 0.875                 | <i>Appl. Catal. B: Environ.</i> <b>2020</b> , 265, 118593  |

## References

- [1] B. Delley, *J. Chem. Phys.* **2000**, *113*, 7756.
- [2] J. P. Perdew, K. Burke and M. Ernzerhof, *Phys. Rev. Lett.* **1996**, *77*, 3865.
- [3] J. P. Perdew, K. Burke and M. Ernzerhof, *Phys. Rev. Lett.* **1997**, *78*, 1396.
- [4] Z. Yang, Y. Wang, M. Zhu, Z. Li, W. Chen, W. Wei, T. Yuan, Y. Qu, Q. Xu, C. Zhao, X. Wang, P. Li, Y. Li, Y. Wu, Y. Li, *ACS Catal.* **2019**, *9*, 2158.
- [5] J. K. Nørskov, J. Rossmeisl, A. Logadottir, L. Lindqvist, J. R. Kitchin, T. Bligaard, H. Jonsson, *J. Phys. Chem. B* **2004**, *108*, 17886.
